# Supplementary material for: Ferulic acid supplementation alleviates hyperuricemia in high-fructose/fat diet-fed rats via promoting uric acid excretion and mediating the gut microbiota
Source: Royal Society of Chemistry journal article supplement (doi:10.1039/d2fo03332a), 2023-01-01
Supplement: d2fo03332a1.pdf [file d2fo03332a1.pdf]

**Electronic supplementary information (ESI) for**  
**Ferulic acid supplementation alleviates hyperuricemia in high-fructose/fat diet-**  
**fed rats *via* promoting uric acid excretion and mediating the gut microbiota**

Nanhai Zhang<sup>a</sup>, Jingxuan Zhou<sup>a</sup>, Liang Zhao<sup>b</sup>, Zhen Zhao<sup>a</sup>, Shiran Wang<sup>a</sup>,

Liebing Zhang<sup>a</sup>, Feng Zhou<sup>a,\*</sup>

<sup>a</sup> *Beijing Key Laboratory of Functional Food from Plant Resources, College of Food Science and Nutritional Engineering, China Agricultural University, Beijing 100083, People's Republic of China*

<sup>b</sup> *Beijing Advance Innovation Center for Food Nutrition and Human Health, Beijing Engineering and Technology Research Center of Food Additives, Beijing Technology and Business University, Beijing 100048, People's Republic of China*

\* Corresponding author: E-mail: zf@cau.edu.cn; Fax: +86 10 62737334; Tel: +86 10 62737129.

## Figure

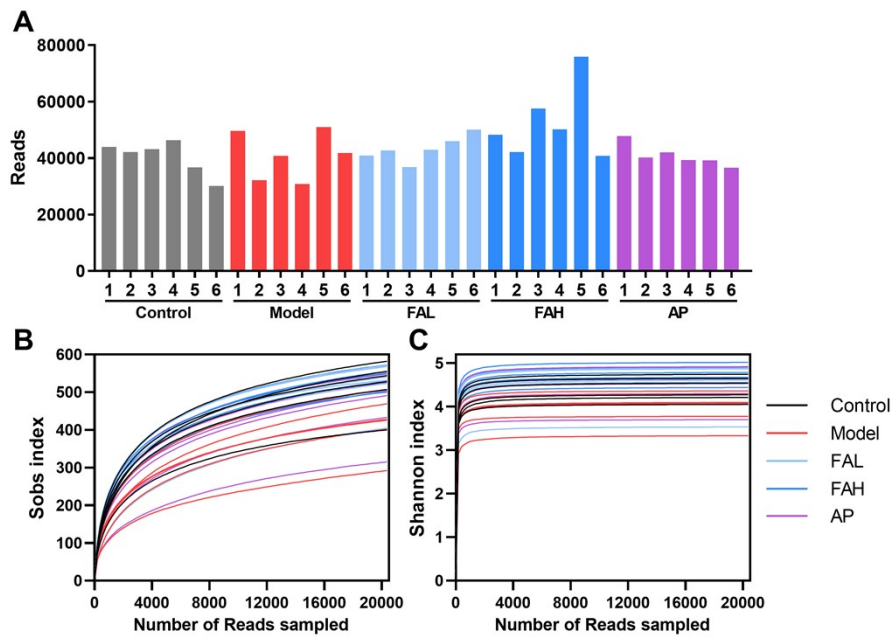

**Fig. S1** Diversity estimation of the gut microbiota in each sample. (A) The number of clean reads. Rarefaction curves based on Sobs (B) and Shannon (C) indices at the operational taxonomic unit level. Control: control group supplied with a standard diet; Model: model group supplied with a HFFD; FAL: low-dose FA group supplied with a HFFD containing 0.05% FA; FAH: high-dose FA group supplied with a HFFD containing 0.1% FA; AP: allopurinol group supplied with a HFFD containing 0.0145% allopurinol.

## Tables

**Table S1** Composition of diets in different groups

|                                  | Control | Model | FAL | FAH | AP    |
|----------------------------------|---------|-------|-----|-----|-------|
| corn starch (g/kg)               | 250     | -     |     |     |       |
| wheat middling (g/kg)            | 200     | -     |     |     |       |
| refined wheat flour (g/kg)       | 219     | 420   | 420 | 420 | 420   |
| soybean meal (g/kg)              | 200     | 80    | 80  | 80  | 80    |
| fructose (g/kg)                  | -       | 180   | 180 | 180 | 180   |
| lard (g/kg)                      | -       | 200   | 200 | 200 | 200   |
| chicken powder (g/kg)            | -       | 80    | 80  | 80  | 80    |
| sodium cholate (g/kg)            | -       | 2     | 2   | 2   | 2     |
| miscellaneous meal (g/kg)        | 45      | -     | -   | -   | -     |
| vegetable oil (g/kg)             | 20      | -     | -   | -   | -     |
| fish meal (g/kg)                 | 20      | -     | -   | -   | -     |
| calcium bicarbonate (g/kg)       | 10      | 10    | 10  | 10  | 10    |
| mountain flour (g/kg)            | 16      | 8     | 8   | 8   | 8     |
| vitamin & mineral mixture (g/kg) | 20      | 20    | 20  | 20  | 20    |
| ferulic acid (g/kg)              | -       | -     | 0.5 | 1   | -     |
| allopurinol (g/kg)               | -       | -     | -   | -   | 0.145 |

Control: control group supplied with a standard diet; Model: model group supplied with a HFFD; FAL: low-dose FA group supplied with a HFFD containing 0.05% FA; FAH: high-dose FA group supplied with a HFFD containing 0.1% FA; AP: allopurinol group supplied with a HFFD containing 0.0145% allopurinol.

**Table S2** Sequences of the human-specific primers used for quantitative real-time polymerase chain reaction

| Gene            | Sense | Sequence (5'-3')        | No.            |
|-----------------|-------|-------------------------|----------------|
| <i>SLC22A12</i> | F     | CGTGTACTGCCTGTTCCGCT    | NM_144585.4    |
|                 | R     | CCACTCCATCAGGAGAGTGCC   |                |
| <i>SLC2A9</i>   | F     | CCTCTACGGCTACAACCT      | NM_020041.3    |
|                 | R     | GATGGCGAATATGGACACA     |                |
| <i>TLR4</i>     | F     | GGACCTTTCCAGCAACAAGA    | NM_138554.5    |
|                 | R     | CAGGGACAGGTCTAAAGAGAGA  |                |
| <i>MYD88</i>    | F     | CCAGTTTGTGCAGGAGATGA    | NM_001172567.2 |
|                 | R     | GCTCACTAGCAATAGACCAGAC  |                |
| <i>IKBKB</i>    | F     | CCAGCCAAGAAGAGTGAAGAA   | NM_001556.3    |
|                 | R     | CCGTGAAACTCTGGTCTTGT    |                |
| <i>NFKBIA</i>   | F     | CTCCGAGACTTTCGAGGAAATAC | NM_020529.3    |
|                 | R     | CCATTGTAGTTGGTAGCCTTCA  |                |
| <i>NFKB1</i>    | F     | GAGACATCCTTCCGCAAACCT   | NM_003998.4    |
|                 | R     | GGTCCTTCCTGCCATAATC     |                |
| <i>GAPDH</i>    | F     | GATTCCACCCATGGCAAATTC   | NM_002046.7    |
|                 | R     | CTGGAAGATGGTGATGGGATT   |                |

**Table S3** Sequences of the rat-specific primers used for quantitative real-time polymerase chain reaction

| Gene            | Sense | Sequence (5'-3')        | No.            |
|-----------------|-------|-------------------------|----------------|
| <i>Slc22a12</i> | F     | TCTTCTGGTGTCTGTGTCT     | NM_001034943.1 |
|                 | R     | GCTGGCTGTGTTTCATCAT     |                |
| <i>Slc2a9</i>   | F     | CTGAGAGTCCACGATACCT     | NM_001191551.1 |
|                 | R     | CGCATTGAGTCCACATAGT     |                |
| <i>Slc22a9</i>  | F     | AAGTATGAGGCTGGTGAGA     | NM_177481.1    |
|                 | R     | GTGGTCGTCAATGTAGGAG     |                |
| <i>Slc22a13</i> | F     | GAGGCTCACTACTGTTCAG     | NM_001126285.1 |
|                 | R     | GTGGCTCAGGATGTCTTC      |                |
| <i>Abcg2</i>    | F     | GGACAAGCATAGGAATGGA     | NM_181381.2    |
|                 | R     | CTGGTGAATGGAGAAGATGA    |                |
| <i>Slc22a6</i>  | F     | AATGTGGAATGGATGCCTAT    | NM_017224.2    |
|                 | R     | GAAGAACCAAGAGTAGATGAAG  |                |
| <i>Slc22a8</i>  | F     | TGAGCACCGTTATCTTGAAT    | NM_031332.1    |
|                 | R     | CACTGAGGAATGGCATAGG     |                |
| <i>Slc22a1</i>  | F     | CTGTGTGAACTTGGGCTTCT    | NM_012697.1    |
|                 | R     | GTCACCAAGAGACAGAGCTTAC  |                |
| <i>Slc22a2</i>  | F     | CTGGAGTGGCCTATGTGATTC   | NM_031584.2    |
|                 | R     | CCGGTATGCACCAGAAATAGAG  |                |
| <i>Slc22a4</i>  | F     | GAGGAGATTTGAAGAGGCAGAA  | NM_022270.2    |
|                 | R     | GCTCCAGAGGATCGAATATCAC  |                |
| <i>Slc22a5</i>  | F     | CCTCAGTCGCACCACATTTA    | NM_019269.1    |
|                 | R     | ATGGTCAGCCACAGGATTATG   |                |
| <i>Slc17a1</i>  | F     | GTGCATTCCCTGGAGTCTTGATA | NM_133554.2    |
|                 | R     | CATTGGGTATGCTCCAGATAGG  |                |
| <i>Tlr4</i>     | F     | CAGAGCCGTTGGTGTATCTT    | NM_019178.2    |
|                 | R     | AGCAAGGACTTCTCCACTTTC   |                |
| <i>Myd88</i>    | F     | GAAGCGACTGATCCCTATCAAG  | NM_198130.2    |
|                 | R     | TTGGTGCAAGGGTTGGTATAG   |                |
| <i>Ikkkb</i>    | F     | CCAAGAGACCAAAGGACAGAAG  | NM_053355.3    |
|                 | R     | GAGAGTAAATCACCCGCACTTT  |                |
| <i>Nfkbia</i>   | F     | AGTAACCTACCAGGGCTACTC   | NM_001105720.2 |
|                 | R     | ATAGCTCTCCTCATCCTCACTC  |                |
| <i>Nfkb1</i>    | F     | GGTTACGGGAGATGTGAAGATG  | NM_001276711.1 |
|                 | R     | GTGGATGATGGCTAAGTGTAGG  |                |
| <i>Gapdh</i>    | F     | GCTGCCTTCTCTTGTGAC      | NM_017008.4    |
|                 | R     | CTTGACTGTGCCGTTGAA      |                |

## Raw images of Western blot

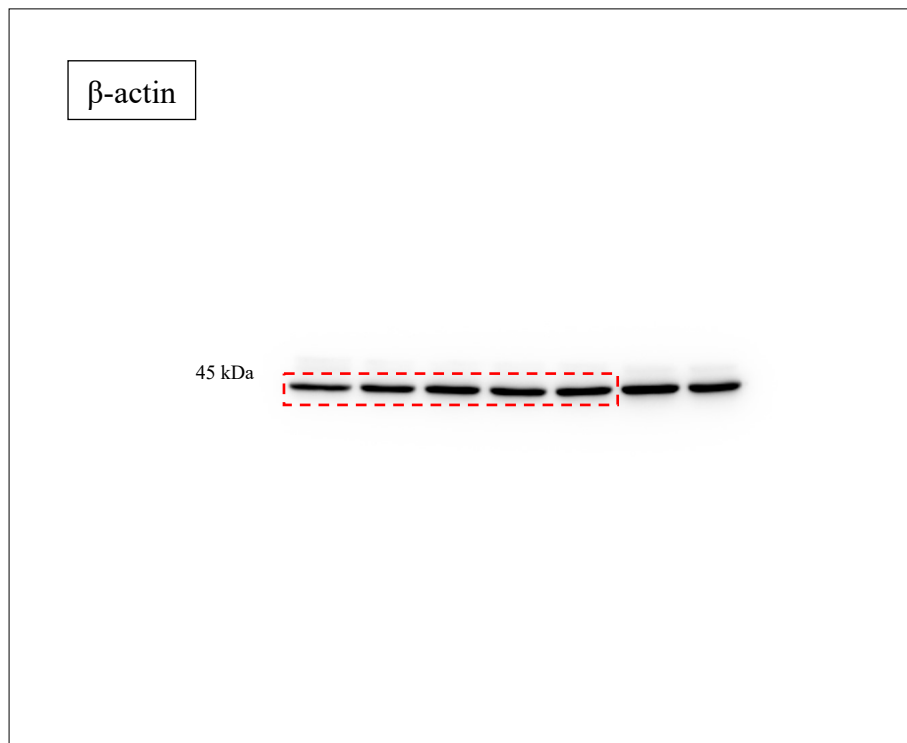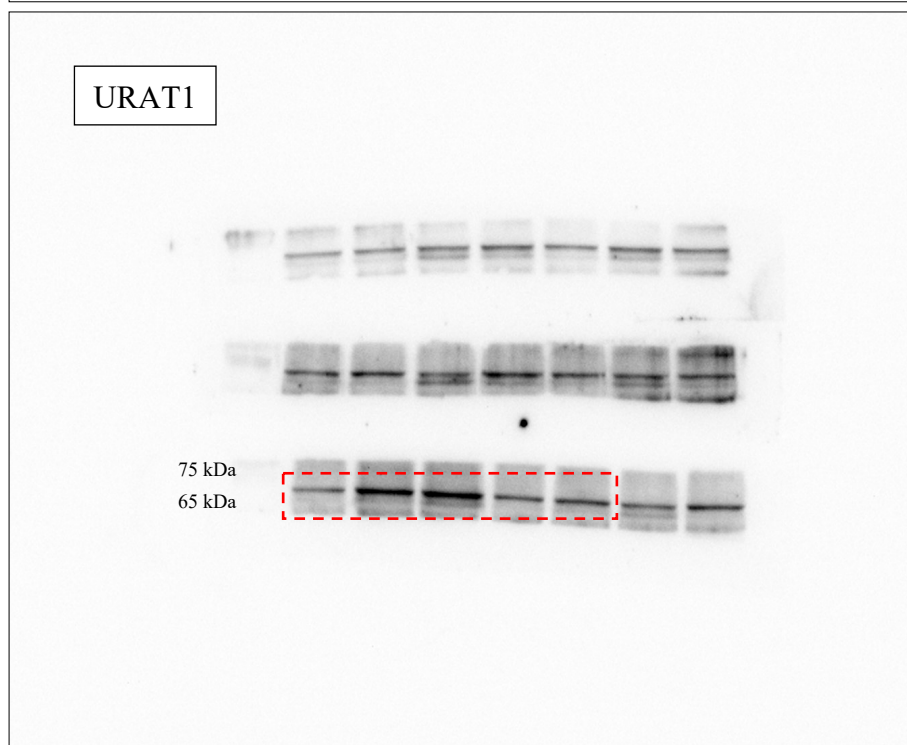

GLUT9

65 kDa

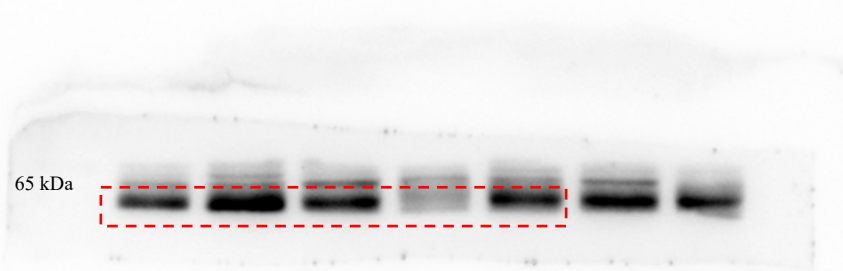

ABCG2

75 kDa

65 kDa

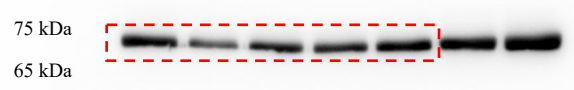

OAT3

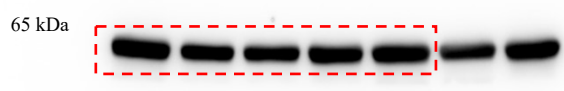

OCT1

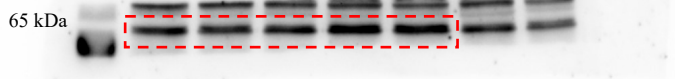



OCT2

65 kDa

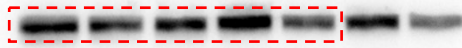

OCTN2

75 kDa

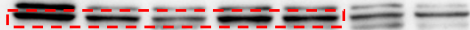

**Raw images of H&E staining micrographs in kidney tissues**

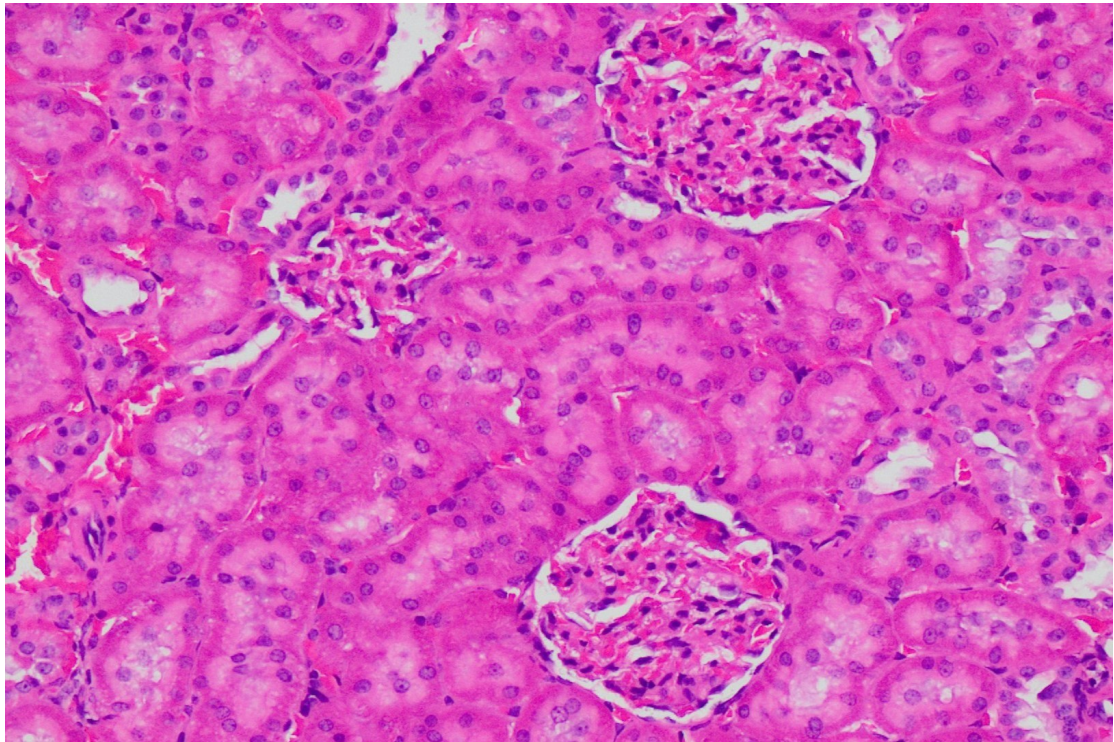

**Control**

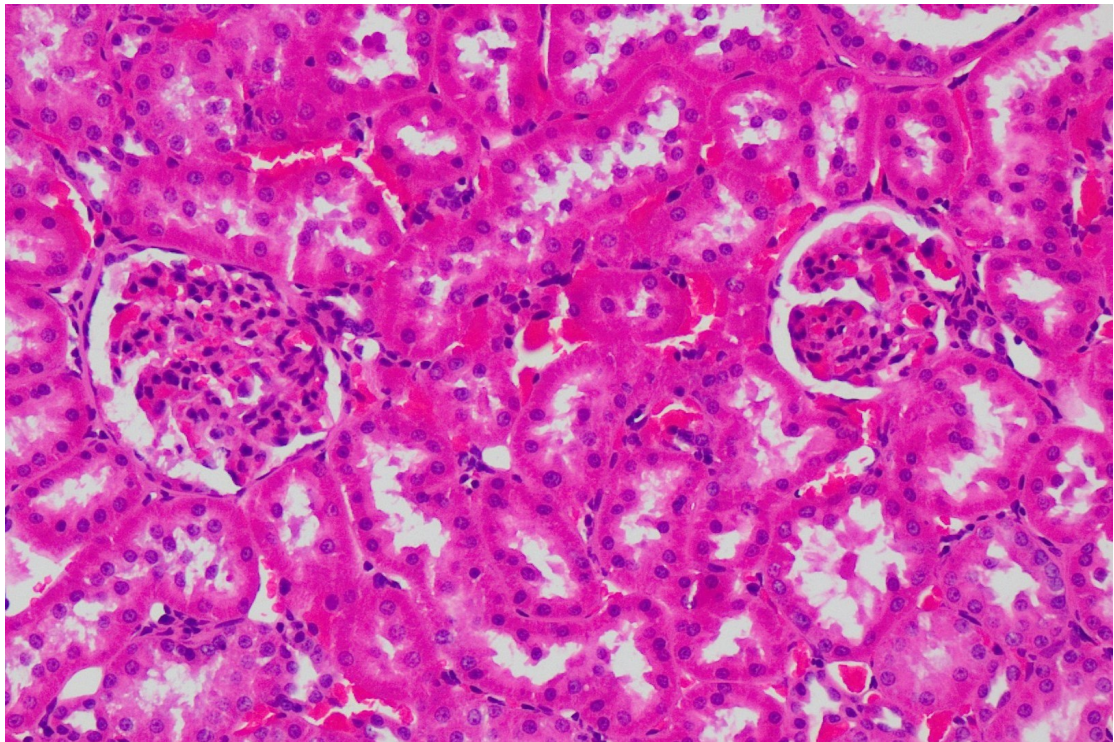

**Model**

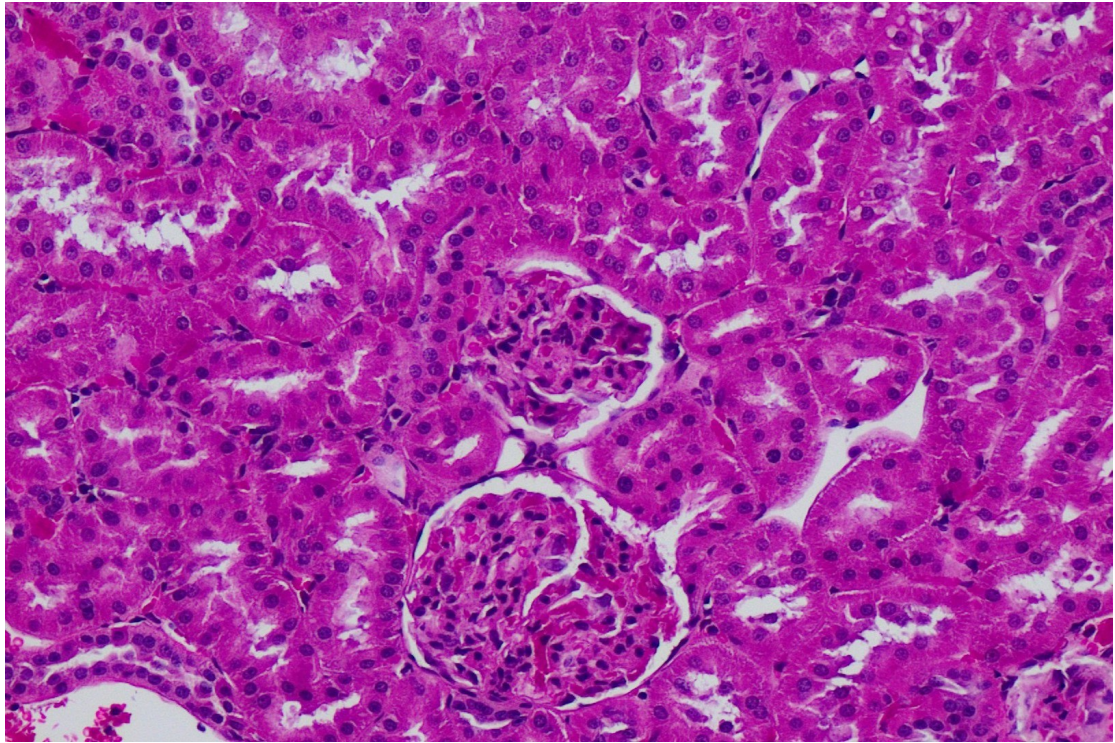

**FAL**

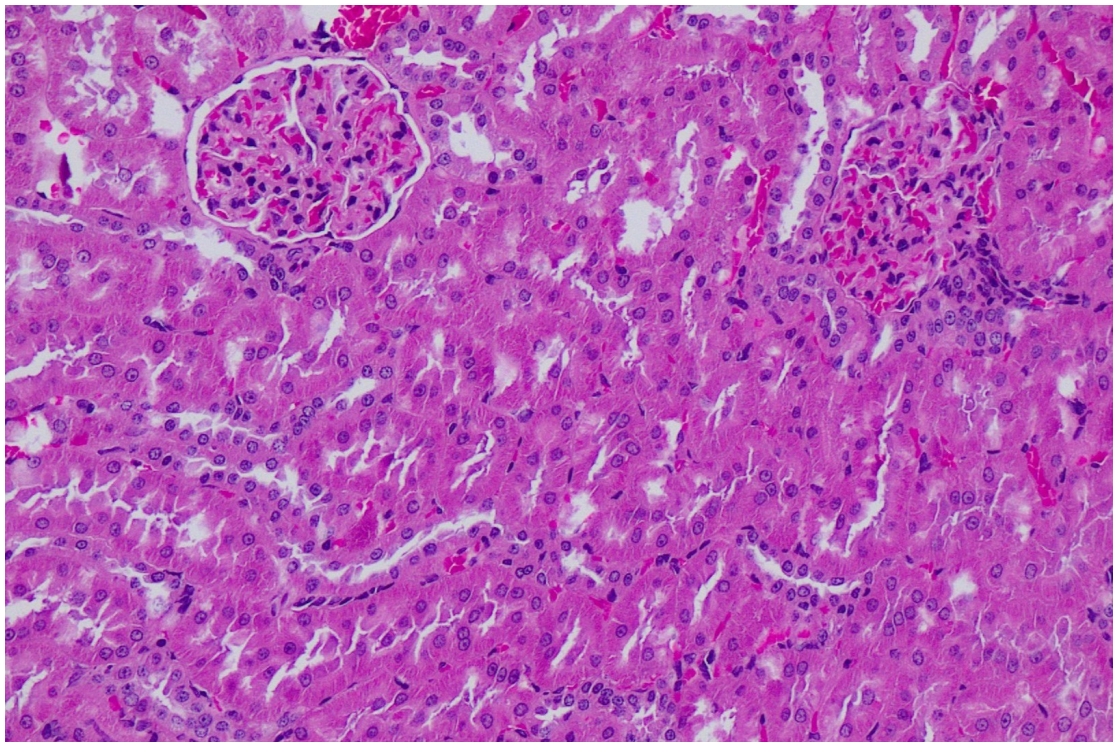

**FAH**

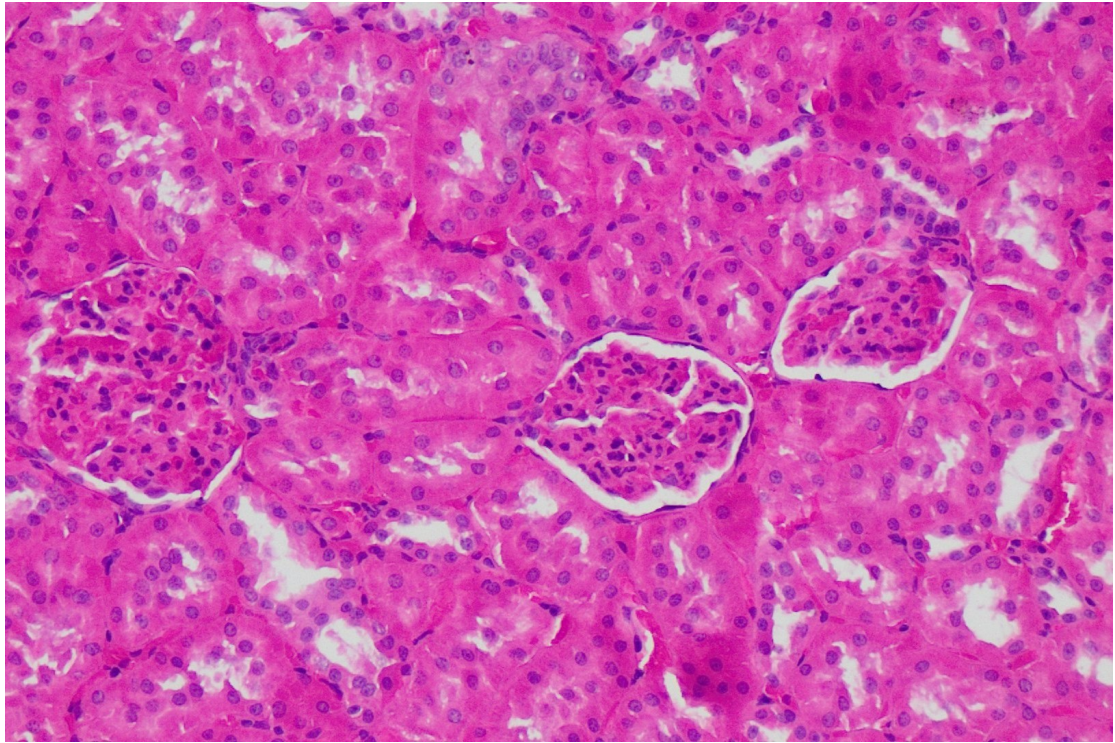

AP
